# Supplementary material for: Enhancement of cyclability of urchin-like rutile TiO2 submicron spheres by nanopainting with carbon
Source: Royal Society of Chemistry journal article supplement (doi:10.1039/c2jm32378h), 2012-01-01
Supplement: c2jm32378h.pdf [file c2jm32378h.pdf]

# Electronic Supplementary Information

## Enhancement of Cyclability of Urchin-Like Rutile TiO<sub>2</sub> Submicron Spheres by Nanopainting with Carbon

Kyung-Soo Park,<sup>‡</sup> Kyung-Mi Min,<sup>‡</sup> Yun-Ho Jin, Seung-Deok Seo, Gwang-Hee Lee, Hyun-Woo Shim, and Dong-Wan Kim\*

*Department of Materials Science and Engineering, Ajou University, Suwon 443-749, Korea*

[\*] To whom correspondence should be addressed. E-mail: [dwkim@ajou.ac.kr](mailto:dwkim@ajou.ac.kr)

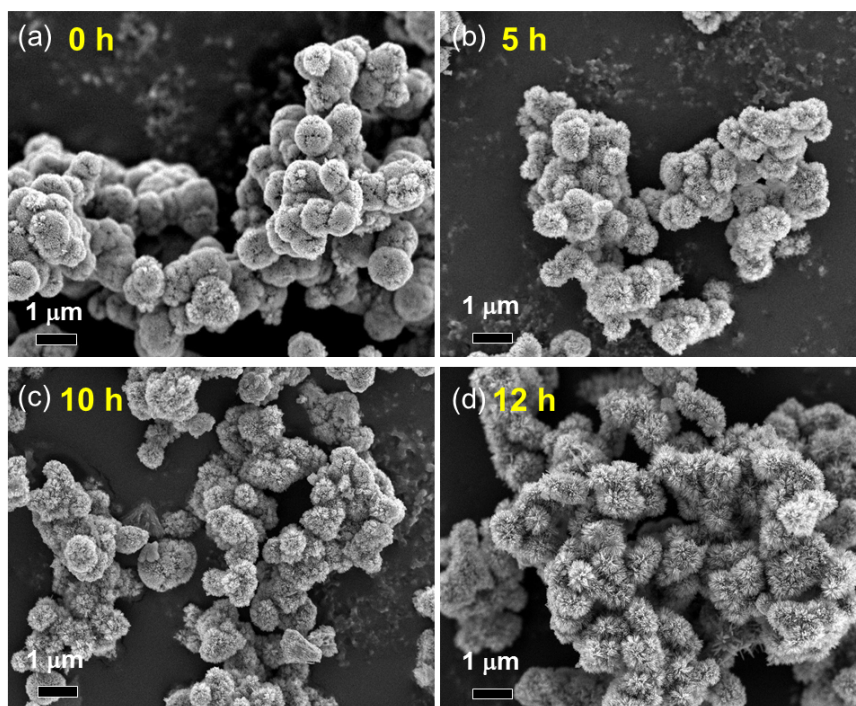

**Figure S1.** Low-magnification FE-SEM images showing morphological evolution of the U-TiO<sub>2</sub> submicron spheres synthesized at 90 °C for various reaction times: (a) 0, (b) 5, (c) 10, and (d) 12 h.

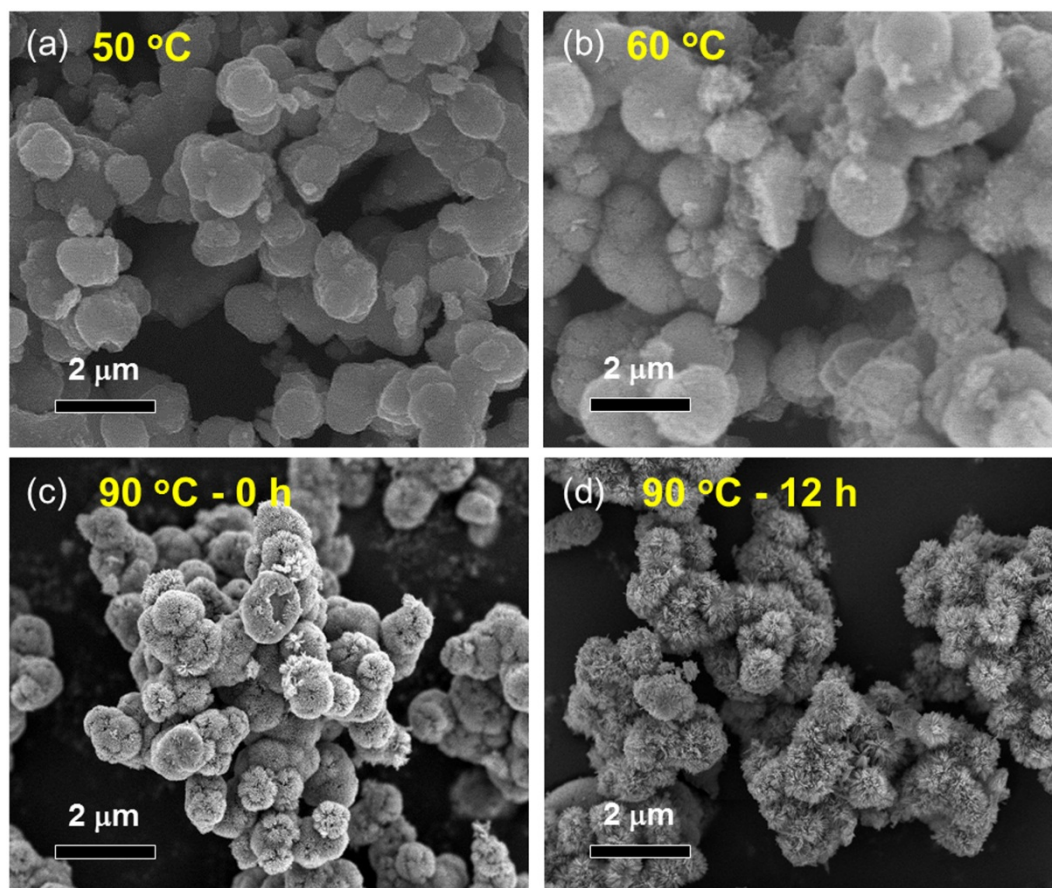

**Figure S2.** Typical FE-SEM images of U-TiO<sub>2</sub> submicron spheres synthesized using various synthetic temperatures and growth times: (a) 50 °C for 0 h, (b) 60 °C for 0 h, (c) 90 °C for 0 h, and (d) 90 °C for 12 h.

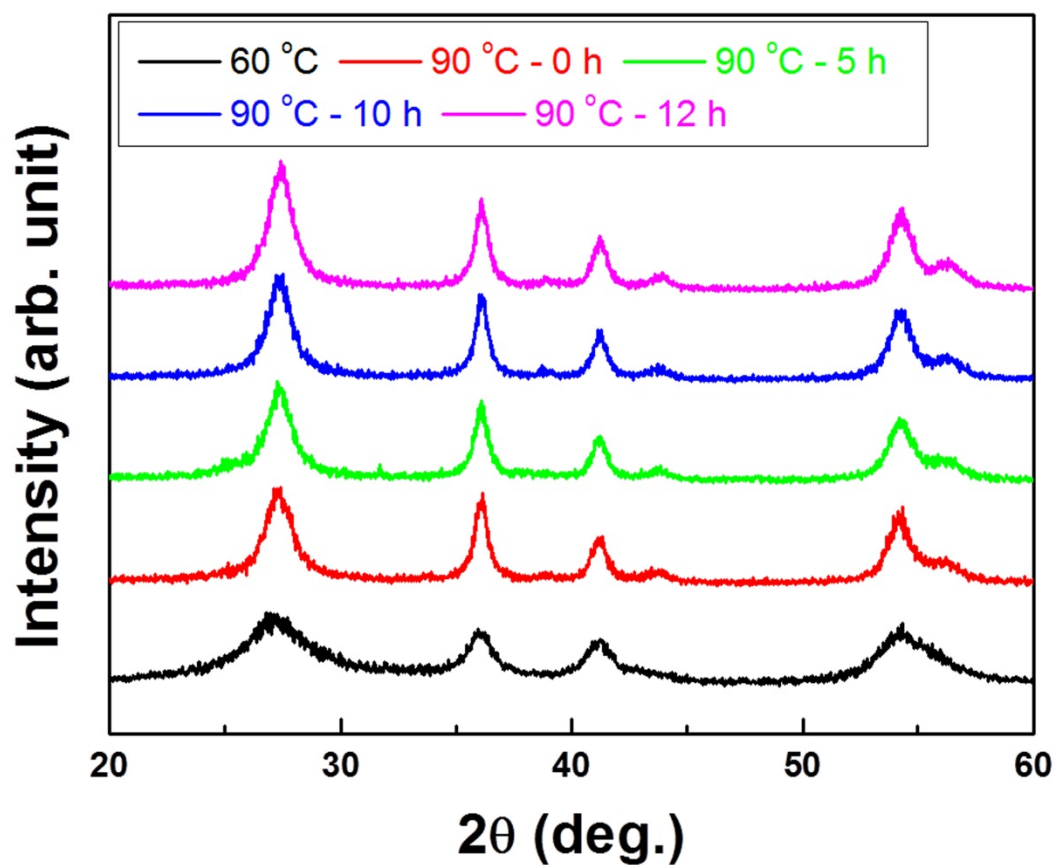

**Figure S3.** XRD patterns of the U-TiO<sub>2</sub> submicron spheres synthesized using various synthetic temperatures and growth times.

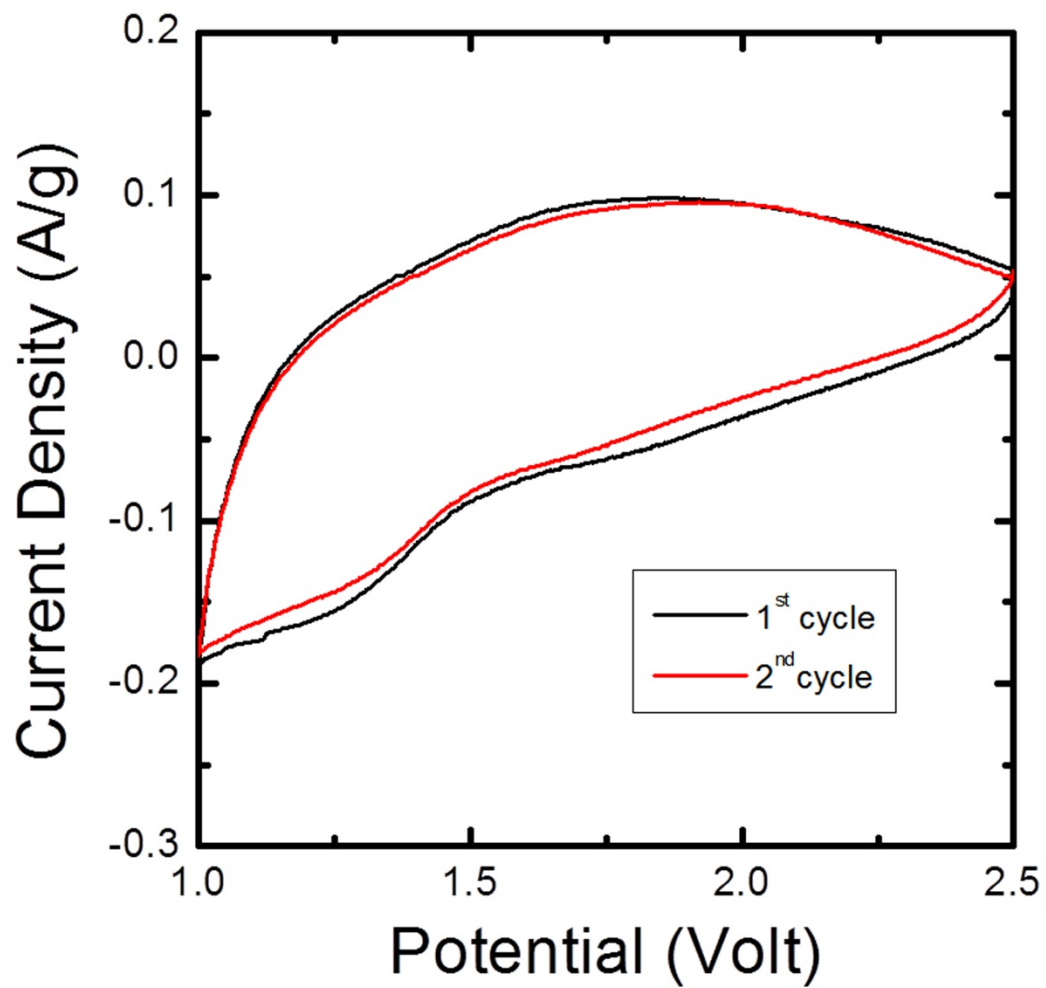

**Figure S4.** Typical cyclic voltammetry results for the U-TiO<sub>2</sub> submicron sphere electrode at a scanning rate of 0.3 mV/s.

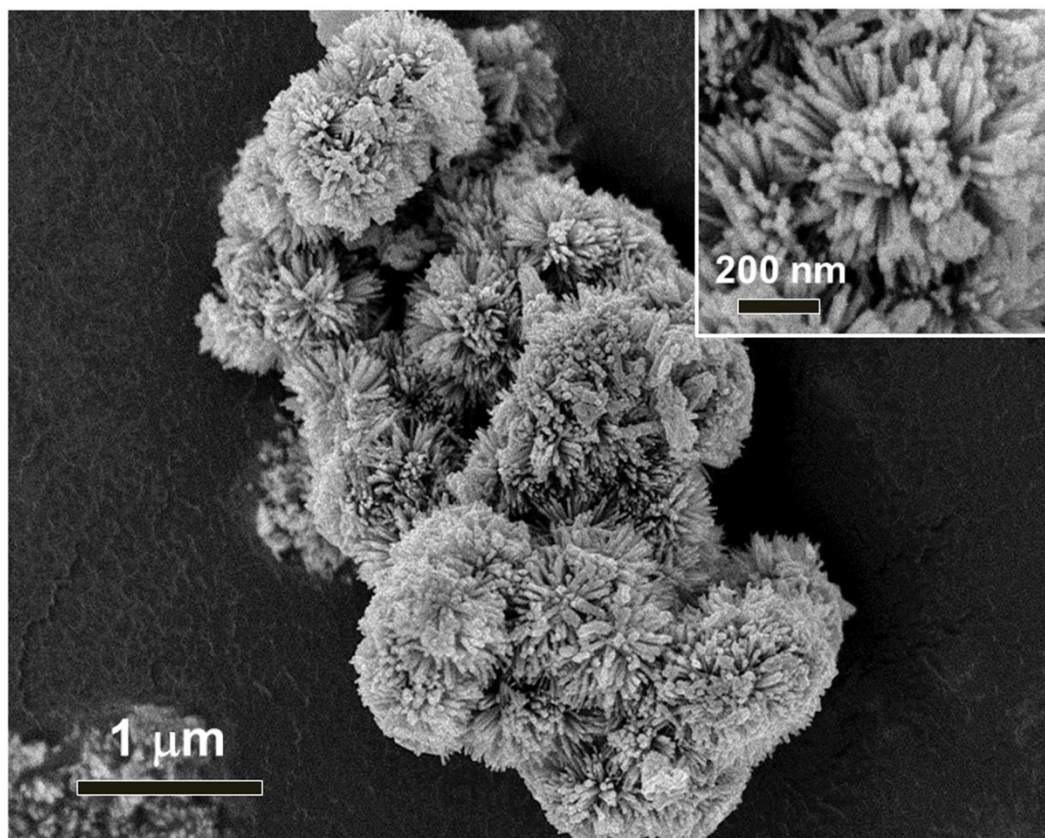

**Figure S5.** Typical low- and high-magnification (inset) FE-SEM images of the carbon-coated U-TiO<sub>2</sub> submicron spheres.

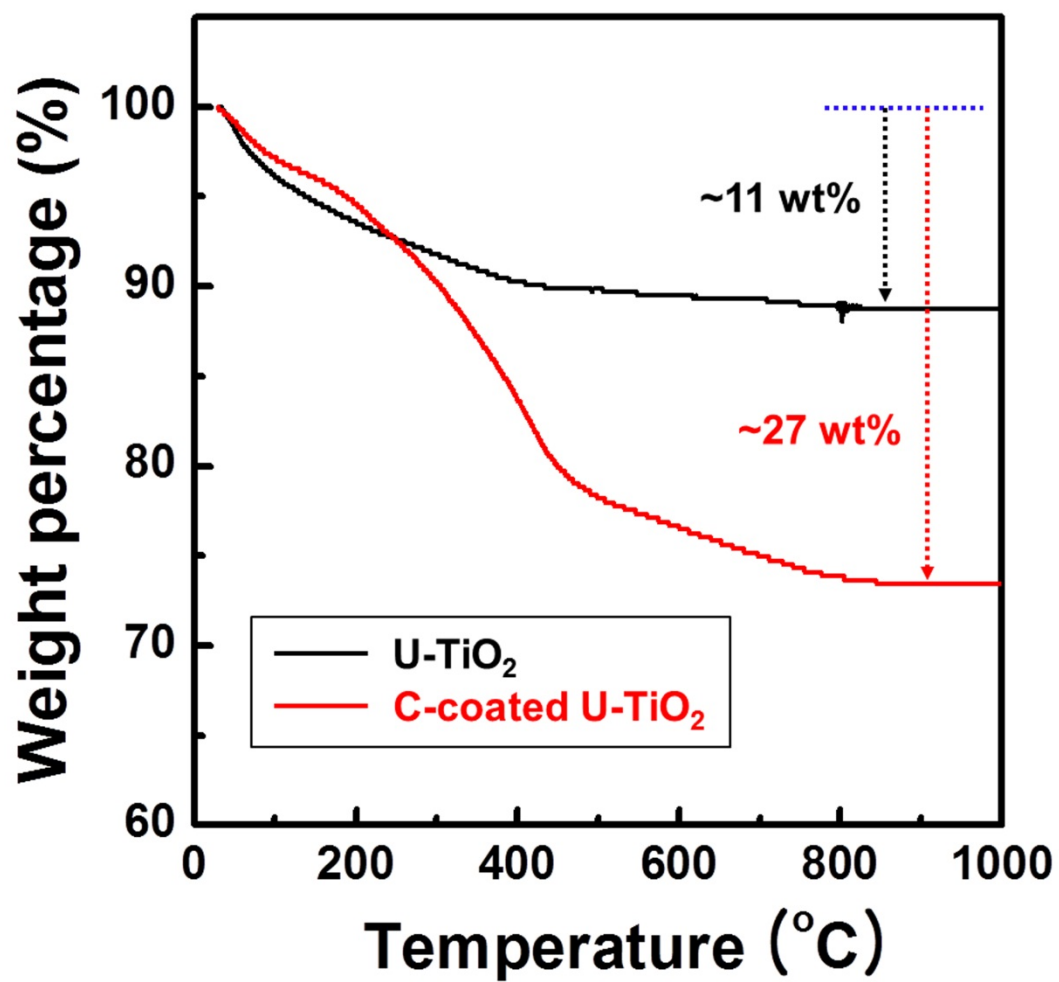

**Figure S6.** TG curves for the as-prepared and carbon-coated U-TiO<sub>2</sub> submicron spheres at a heating rate of 10 °C/min in air.

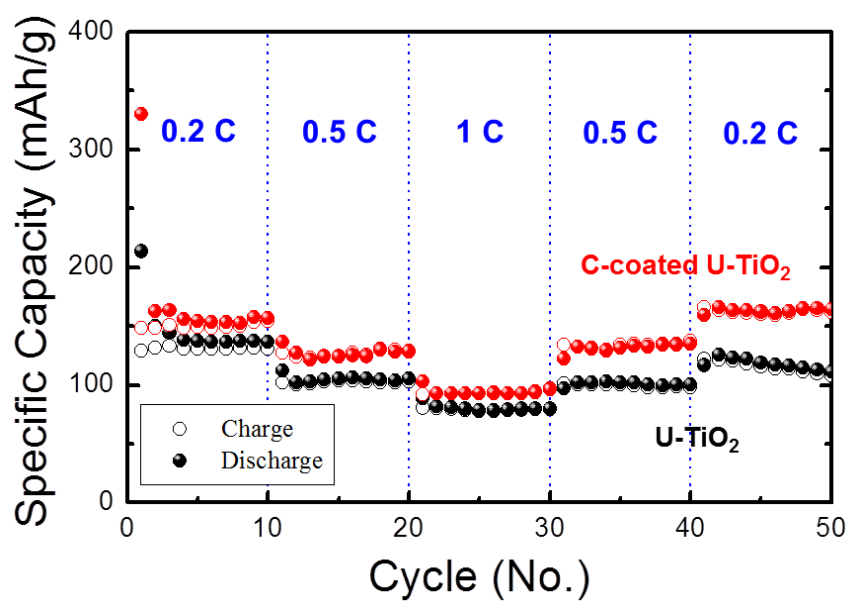

**Figure S7.** Rate capability of the carbon-coated and as-prepared U-TiO<sub>2</sub> submicron sphere electrodes at various current densities of 0.2, 0.5, and 1 C.



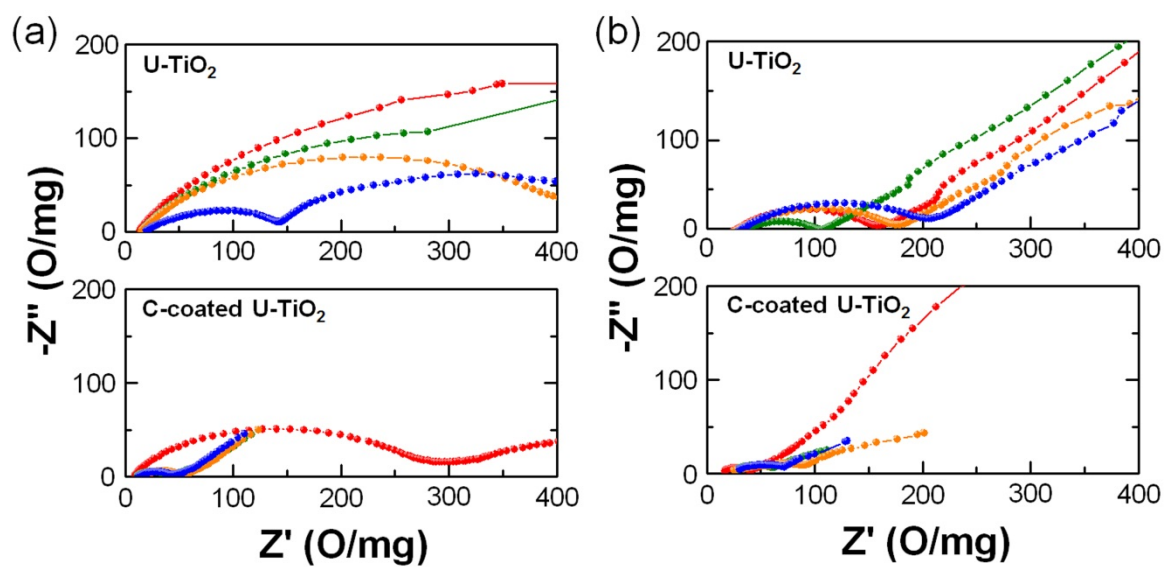

**Figure S8.** Nyquist plots collected at the 1st (red line), 2nd (green line), 5th (orange line), and 10th (blue line) (a) discharged and (b) charged states of carbon-coated and as-prepared U-TiO<sub>2</sub> submicron sphere electrodes.
